# Supplementary material for: Large optical anisotropy-oriented construction of a carbonate-nitrate chloride compound as a potential ultraviolet birefringent material
Source: Royal Society of Chemistry journal article supplement (doi:10.1039/d2sc03771h), 2022-01-01
Supplement: d2sc03771h1.pdf [file d2sc03771h1.pdf]

Supporting information

**Large Optical Anisotropy-Oriented Construction of Carbonate-Nitrate Chloride as Potential Ultraviolet Birefringent Materials**

Meng Cheng,<sup>ab</sup> Wenqi Jin,<sup>ab</sup> Zhihua Yang,<sup>ab</sup> Shilie Pan<sup>\*ab</sup>

<sup>a</sup>Research Center for Crystal Materials; CAS Key Laboratory of Functional Materials and Devices for Special Environments; Xinjiang Technical Institute of Physics and Chemistry, CAS, 40-1 South Beijing Road, Urumqi 830011, China.

<sup>b</sup>Center of Materials Science and Optoelectronics Engineering, University of Chinese Academy of Sciences, Beijing 100049, China.

\*Corresponding author: [slpan@ms.xjb.ac.cn](mailto:slpan@ms.xjb.ac.cn)

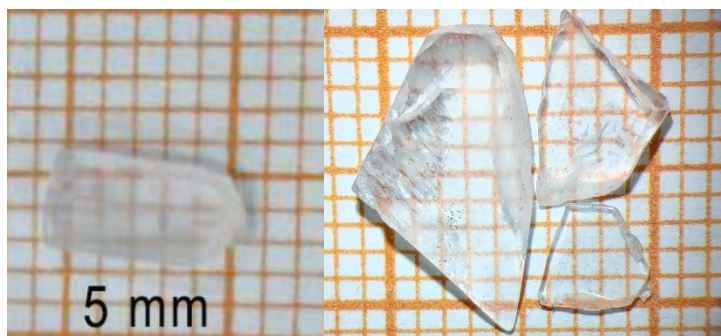

Figure S1. Photograph of crystals grown via mild solvent evaporation method.

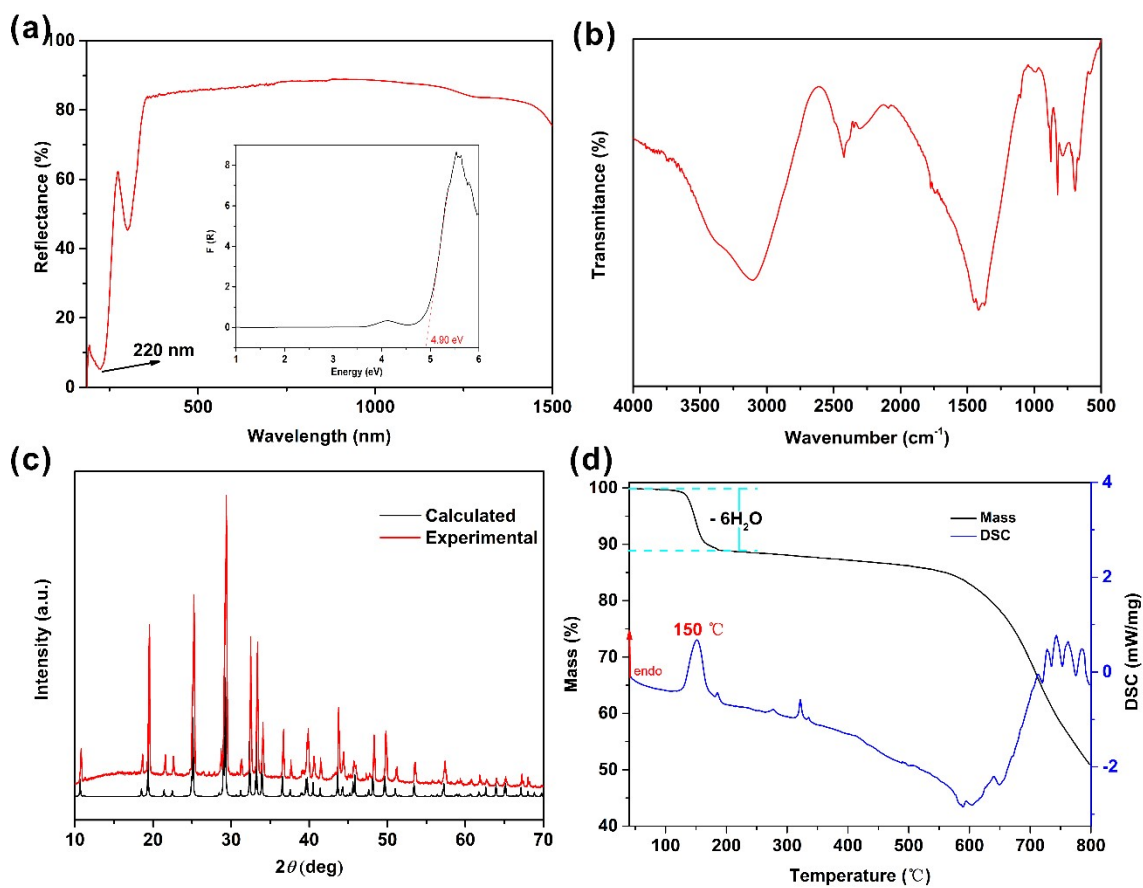

Figure S2. (a) UV-vis-NIR diffuse reflectance spectra for  $\text{Na}_3\text{Rb}_6(\text{CO}_3)_3(\text{NO}_3)_2\text{Cl}\cdot(\text{H}_2\text{O})_6$ ; (b) IR spectrum for  $\text{Na}_3\text{Rb}_6(\text{CO}_3)_3(\text{NO}_3)_2\text{Cl}\cdot(\text{H}_2\text{O})_6$ ; (c) XRD patterns; (d) TG and DSC curves of  $\text{Na}_3\text{Rb}_6(\text{CO}_3)_3(\text{NO}_3)_2\text{Cl}\cdot(\text{H}_2\text{O})_6$  in the temperature region from 40 to 800  $^{\circ}\text{C}$ .

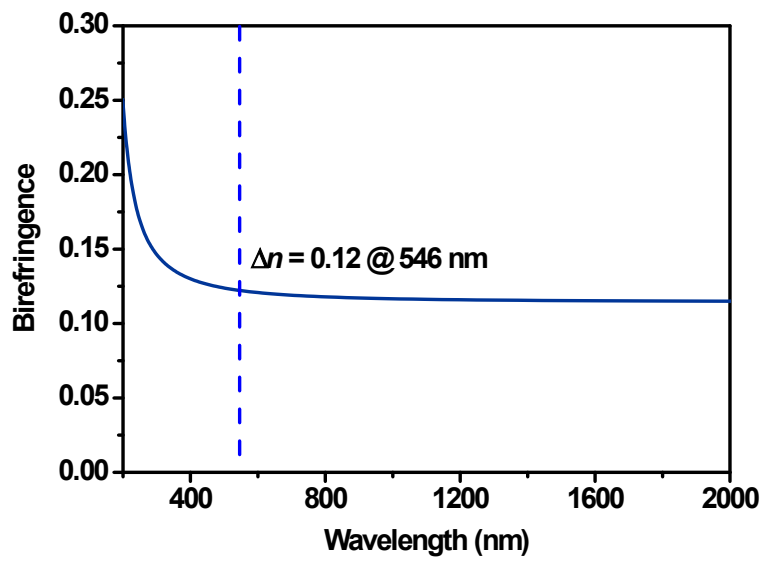

Figure S3. Calculated birefringence curve.

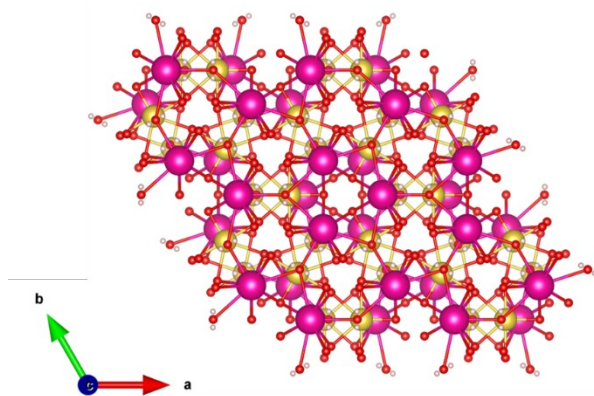

Figure S4. The structure of the title compounds in the *ab* plane excluding C, N and Cl atoms.

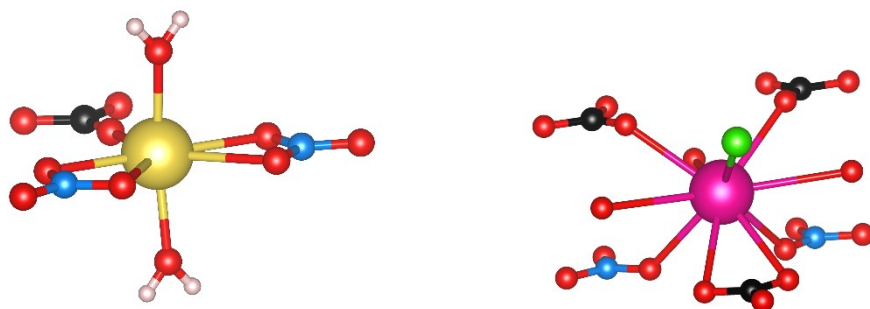

Figure S5. Alignments of planar triangular anion groups by the  $\text{NaO}_5(\text{H}_2\text{O})_2$  and  $\text{RbO}_9\text{Cl}$  polyhedra.

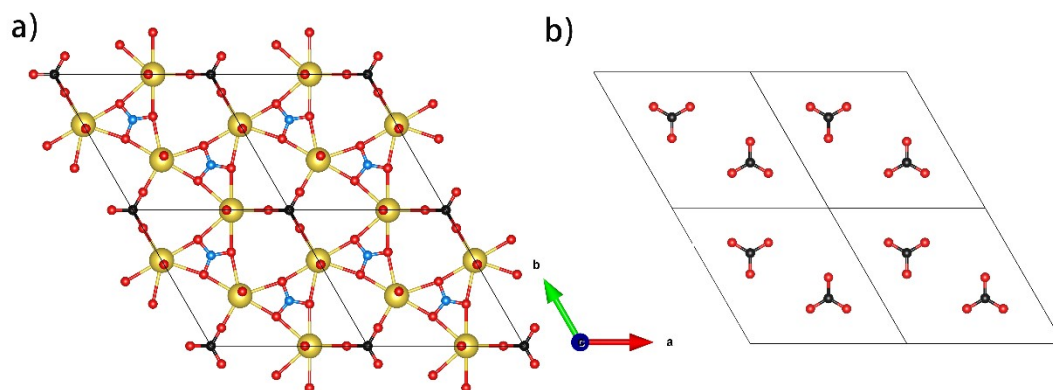

Figure S6. a) Two-dimensional (2D) layer of NaO<sub>7</sub> pentagonal bipyramid, C(1)O<sub>3</sub> and NO<sub>3</sub> trigonal plane units; b) The C(2)O<sub>3</sub> trigonal plane units in the *ab* plane.

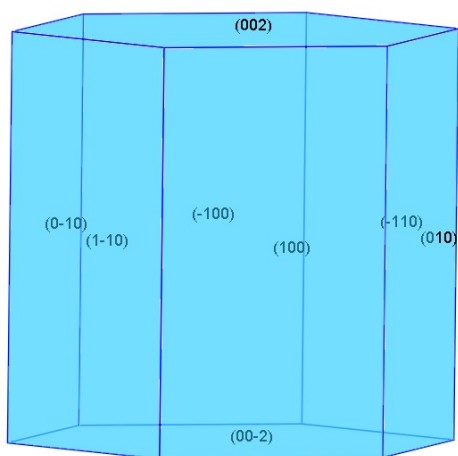

Figure S7. Theoretical crystal morphology of  $\text{Na}_3\text{Rb}_6(\text{CO}_3)_3(\text{NO}_3)_2\text{Cl}\cdot(\text{H}_2\text{O})_6$ .



Table S1. Atomic coordinates ( $\times 10^4$ ), equivalent isotropic displacement parameters ( $\text{\AA}^2 \times 10^3$ ) and bond valence sum (BVS) calculation for  $\text{Na}_3\text{Rb}_6(\text{CO}_3)_3(\text{NO}_3)_2\text{Cl} \cdot (\text{H}_2\text{O})_6$ .  $U(\text{eq})$  is defined as one third of the trace of the orthogonalized  $U_{ij}$  tensor.

|       | <b>Wyckoff sites</b> | <b><i>x</i></b> | <b><i>y</i></b> | <b><i>z</i></b> | <b><i>U(eq)</i></b> | <b>BVS</b> |
|-------|----------------------|-----------------|-----------------|-----------------|---------------------|------------|
| Na(1) | 6g                   | 3703(2)         | 0               | 2500            | 24(1)               | 1.22       |
| Rb(1) | 12k                  | 2737(1)         | 2737(1)         | 1192(1)         | 27(1)               | 1.10       |
| C(1)  | 2a                   | 0               | 0               | 2500            | 16(2)               | 4.08       |
| C(2)  | 4d                   | 6667            | 3333            | 0               | 24(2)               | 4.04       |
| N(1)  | 4c                   | 6667            | 3333            | 2500            | 22(1)               | 4.91       |
| O(1)  | 6g                   | 0               | 1334(4)         | 2500            | 28(1)               | 2.09       |
| O(2)  | 12j                  | 5123(4)         | 2562(2)         | 0               | 33(1)               | 1.60       |
| O(3)  | 12k                  | 5997(4)         | 5997(4)         | 1053(2)         | 36(1)               | 0.45       |
| O(4)  | 6g                   | 5256(4)         | 3088(4)         | 2500            | 34(1)               | 2.08       |
| Cl(1) | 2b                   | 0               | 0               | 0               | 29(1)               | 1.26       |

Table S2. Selected bond distances (Å) and angles (deg) for Na<sub>3</sub>Rb<sub>6</sub>(CO<sub>3</sub>)<sub>3</sub>(NO<sub>3</sub>)<sub>2</sub>Cl·(H<sub>2</sub>O)<sub>6</sub>.

| Bond          | Distances (Å) |
|---------------|---------------|
| Na(1)-O(4)    | 2.560(3)      |
| Na(1)-O(4)#4  | 2.715(4)      |
| Na(1)-O(4)#11 | 2.560(3)      |
| Na(1)-O(4)#12 | 2.715(4)      |
| Na(1)-O(3)#4  | 2.307(3)      |
| Na(1)-O(3)#13 | 2.307(3)      |
| Na(1)-O(1)#6  | 2.268(4)      |
| Rb(1)-Cl(1)   | 3.2282(4)     |
| Rb(1)-O(4)    | 3.066(2)      |
| Rb(1)-O(4)#2  | 3.066(2)      |
| Rb(1)-O(2)    | 3.030(2)      |
| Rb(1)-O(2)#3  | 3.030(2)      |
| Rb(1)-O(3)#4  | 3.400(3)      |
| Rb(1)-O(3)    | 3.128(4)      |
| Rb(1)-O(3)#5  | 3.400(3)      |
| Rb(1)-O(1)    | 3.0718(4)     |
| Rb(1)-O(1)#6  | 3.0718(4)     |
| C(1)-O(1)#1   | 1.277(4)      |
| C(1)-O(1)     | 1.277(4)      |
| C(1)-O(1)#6   | 1.277(4)      |
| C(2)-O(2)#4   | 1.280(3)      |
| C(2)-O(2)#17  | 1.280(3)      |
| N(1)-O(4)#15  | 1.250(3)      |
| N(1)-O(4)#4   | 1.250(3)      |

| Bond                      | Angles (deg) | Bond                | Angles (deg) |
|---------------------------|--------------|---------------------|--------------|
| O(4)#4-Na(1)-O(4)#12      | 82.91(13)    | O(2)#3-Rb(1)-Cl(1)  | 85.41(4)     |
| O(4)#11-Na(1)-<br>O(4)#12 | 48.36(13)    | O(2)-Rb(1)-O(4)#2   | 132.40(7)    |
| O(4)-Na(1)-O(4)#12        | 131.27(8)    | O(2)#3-Rb(1)-O(4)#2 | 81.55(5)     |
| O(4)-Na(1)-O(4)#4         | 48.36(13)    | O(2)-Rb(1)-O(4)     | 81.55(5)     |
| O(4)#11-Na(1)-O(4)#4      | 131.27(8)    | O(2)#3-Rb(1)-O(4)   | 132.40(7)    |
| O(4)-Na(1)-O(4)#11        | 179.63(17)   | O(2)#3-Rb(1)-O(2)   | 88.984(13)   |
| O(3)#13-Na(1)-<br>O(4)#12 | 84.62(8)     | O(2)#3-Rb(1)-O(3)   | 66.93(5)     |
| O(3)#13-Na(1)-O(4)#4      | 84.62(8)     | O(2)-Rb(1)-O(3)#4   | 49.30(5)     |
| O(3)#13-Na(1)-<br>O(4)#11 | 89.977(11)   | O(2)-Rb(1)-O(3)     | 66.93(5)     |
| O(3)#4-Na(1)-O(4)#11      | 89.977(11)   | O(2)#3-Rb(1)-O(3)#4 | 135.74(6)    |

|                      |            |                     |            |
|----------------------|------------|---------------------|------------|
| O(3)#4-Na(1)-O(4)#4  | 84.62(8)   | O(2)#3-Rb(1)-O(3)#5 | 49.30(5)   |
| O(3)#4-Na(1)-O(4)#12 | 84.62(8)   | O(2)-Rb(1)-O(3)#5   | 135.74(6)  |
| O(3)#4-Na(1)-O(4)    | 89.977(11) | O(2)#3-Rb(1)-O(1)#6 | 153.72(7)  |
| O(3)#13-Na(1)-O(4)   | 89.977(11) | O(2)-Rb(1)-O(1)#6   | 113.09(6)  |
| O(3)#13-Na(1)-O(3)#4 | 165.6(2)   | O(2)-Rb(1)-O(1)     | 153.72(7)  |
| O(1)#6-Na(1)-O(4)#12 | 138.55(7)  | O(2)#3-Rb(1)-O(1)   | 113.09(6)  |
| O(1)#6-Na(1)-O(4)#4  | 138.55(7)  | O(3)-Rb(1)-Cl(1)    | 140.24(6)  |
| O(1)#6-Na(1)-O(4)#11 | 90.19(8)   | O(3)-Rb(1)-O(3)#4   | 101.65(4)  |
| O(1)#6-Na(1)-O(4)    | 90.19(8)   | O(3)#5-Rb(1)-O(3)#4 | 154.95(9)  |
| O(1)#6-Na(1)-O(3)#4  | 97.18(11)  | O(3)-Rb(1)-O(3)#5   | 101.65(4)  |
| O(1)#6-Na(1)-O(3)#13 | 97.18(11)  | O(1)#6-Rb(1)-Cl(1)  | 82.51(3)   |
| Cl(1)-Rb(1)-O(3)#5   | 78.12(5)   | O(1)-Rb(1)-Cl(1)    | 82.51(3)   |
| Cl(1)-Rb(1)-O(3)#4   | 78.12(5)   | O(1)-Rb(1)-O(3)#5   | 63.81(8)   |
| O(4)#2-Rb(1)-Cl(1)   | 139.29(6)  | O(1)-Rb(1)-O(3)     | 133.72(7)  |
| O(4)-Rb(1)-Cl(1)     | 139.29(6)  | O(1)#6-Rb(1)-O(3)#5 | 105.15(8)  |
| O(4)-Rb(1)-O(4)#2    | 71.74(10)  | O(1)#6-Rb(1)-O(3)#4 | 63.81(8)   |
| O(4)#2-Rb(1)-O(3)#4  | 135.11(7)  | O(1)-Rb(1)-O(3)#4   | 105.15(8)  |
| O(4)-Rb(1)-O(3)#5    | 135.11(7)  | O(1)#6-Rb(1)-O(3)   | 133.72(7)  |
| O(4)#2-Rb(1)-O(3)    | 66.45(7)   | O(1)#6-Rb(1)-O(1)   | 42.18(13)  |
| O(4)#2-Rb(1)-O(3)#5  | 64.18(7)   | O(1)-C(1)-O(1)#1    | 120        |
| O(4)-Rb(1)-O(3)      | 66.45(7)   | O(1)-C(1)-O(1)#6    | 120.000(1) |
| O(4)-Rb(1)-O(3)#4    | 64.18(7)   | O(1)#1-C(1)-O(1)#6  | 120        |
| O(4)-Rb(1)-O(1)#6    | 67.88(8)   | O(2)#4-C(2)-O(2)    | 120.000(1) |
| O(4)#2-Rb(1)-O(1)#6  | 92.59(4)   | O(2)#4-C(2)-O(2)#17 | 120        |
| O(4)-Rb(1)-O(1)      | 92.59(4)   | O(4)#4-N(1)-O(4)#15 | 120.000(1) |
| O(4)#2-Rb(1)-O(1)    | 67.88(8)   | O(4)#4-N(1)-O(4)    | 120        |
| O(2)-Rb(1)-Cl(1)     | 85.41(4)   | O(4)#15-N(1)-O(4)   | 120        |

Symmetry transformations used to generate equivalent atoms:

|                    |                    |                        |
|--------------------|--------------------|------------------------|
| # 1 x-y,x,-z       | #2 y,x,z           | # 3-y,x-y,z            |
| # 4 -x+y,-x+1,z    | #5 -y+1,x-y,z      | # 6-x,-y,-z            |
| # 7 y,-x+y,-z      | #8 -x+y,-x,z       | # 9-y+1,x-y,-z+1/2     |
| # 10 x-y,-y,-z+1/2 | #11 -x+1,-x+y,z    | # 12y,x-1,z            |
| # 13 x,y,-z+1/2    | #14 -x+y,-x,-z+1/2 | # 15-x+y+1,-x+1,-z+1/2 |
| # 16 -y+1,x-y+1,z  | # 17-x+y+1,-x+1,z  | # 18-y,x-y,-z+1/2      |

Table S3. Anisotropic displacement parameters for  $\text{Na}_3\text{Rb}_6(\text{CO}_3)_3(\text{NO}_3)_2\text{Cl}\cdot(\text{H}_2\text{O})_6$ .

|       | $U_{11}$ | $U_{22}$ | $U_{33}$ | $U_{23}$ | $U_{13}$ | $U_{12}$ |
|-------|----------|----------|----------|----------|----------|----------|
| Na(1) | 21(1)    | 24(1)    | 26(1)    | 0        | 0        | 12(1)    |
| Rb(1) | 26(1)    | 26(1)    | 28(1)    | 0(1)     | 0(1)     | 11(1)    |
| C(1)  | 21(3)    | 21(3)    | 6(4)     | 0        | 0        | 10(2)    |
| C(2)  | 26(2)    | 26(2)    | 19(4)    | 0        | 0        | 13(1)    |
| N(1)  | 21(2)    | 21(2)    | 25(3)    | 0        | 0        | 10(1)    |
| Cl(1) | 27(1)    | 27(1)    | 31(1)    | 0        | 0        | 14(1)    |
| O(1)  | 33(2)    | 19(2)    | 35(3)    | 0        | 0        | 16(1)    |
| O(2)  | 24(2)    | 30(1)    | 44(2)    | 4(1)     | 0        | 12(1)    |
| O(3)  | 46(2)    | 46(2)    | 26(2)    | -3(1)    | -3(1)    | 31(2)    |
| O(4)  | 19(2)    | 39(2)    | 48(2)    | 0        | 0        | 16(1)    |

Table S4. Hydrogen bonds for  $\text{Na}_3\text{Rb}_6(\text{CO}_3)_3(\text{NO}_3)_2\text{Cl}\cdot(\text{H}_2\text{O})_6$ .

| D-H $\cdots$ A            | d(D-A)/Å | D-H $\cdots$ A/ $^\circ$ |
|---------------------------|----------|--------------------------|
| O(3)-H(3) $\cdots$ O(2)#1 | 2.702(5) | 176(3)                   |

Symmetry transformations used to generate equivalent atoms:

# 1 1-x+y,1-x,z

Table S5. HOMO-LUMO energy gap and polarizability anisotropy of  $\text{BO}_3$ ,  $\text{NO}_3$ , and  $\text{CO}_3$ .

|                                 | <b>Energy gap<br/>(eV)</b> | <b><math>\delta</math></b> |
|---------------------------------|----------------------------|----------------------------|
| <b><math>\text{BO}_3</math></b> | 7.84                       | 9.45                       |
| <b><math>\text{NO}_3</math></b> | 5.39                       | 17.67                      |
| <b><math>\text{CO}_3</math></b> | 7.36                       | 12.80                      |

Table S6. Real-space atom-cutting analysis of calculated birefringence in  $\text{Na}_3\text{Rb}_6(\text{CO}_3)_3(\text{NO}_3)_2\text{Cl}\cdot(\text{H}_2\text{O})_6$ . The cutting radii of Na, Rb, C, N, O ( $\text{CO}_3$ ,  $\text{NO}_3$ ,  $\text{H}_2\text{O}$ ), Cl, and H were set as 0.76, 0.94, 0.28, 0.63, (1.01, 0.63, 0.72) and 0.27 Å, respectively.

| <b>Cut unit</b>                      | <b>Birefringence (@ 546 nm)</b> |
|--------------------------------------|---------------------------------|
| None                                 | 0.12                            |
| $\text{H}_2\text{O}$                 | 0.12                            |
| Na, Rb, Cl, and $\text{H}_2\text{O}$ | 0.14                            |
| $\text{CO}_3$                        | 0.09                            |
| $\text{NO}_3$                        | 0.07                            |
| $\text{CO}_3 + \text{NO}_3$          | 0.03                            |
